# Supplementary material for: Gap-Free Global Annual Soil Moisture: 15km Grids for 1991–2016
Source: Copernicus journal article supplement (doi:10.5194/essd-2019-191), 2019-11-05
Supplement: Supplementary file 1 [file essd-2019-191-supplement.pdf]

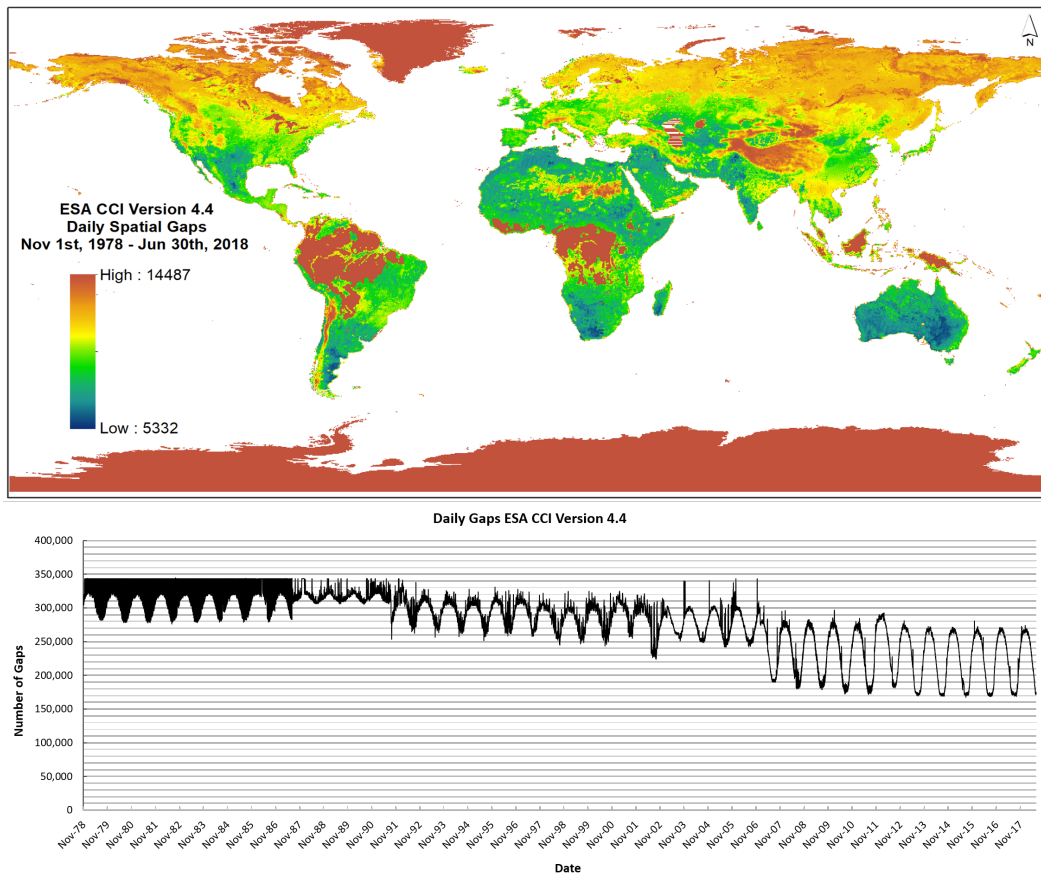

**Figure S1: Map of spatial information gaps in the version 4.4 of the ESA-CCI soil moisture estimate. The number for each pixel indicates the number of gaps between the analyzed period of time. The graph below shows the trend of spatial gaps and time.**
